# Supplementary material for: The gynoecious CmWIP1 transcription factor interacts with CmbZIP48 to inhibit carpel development
Source: PubMed Central journal article supplement (PMC6817838; doi:10.1038/s41598-019-52004-z), 2019-10-28
Supplement: 41598_2019_52004_MOESM1_ESM.pdf [file 41598_2019_52004_MOESM1_ESM.pdf]

## **Supplementary information**

### **The gynoeocious CmWIP1 transcription factor interacts with CmbZIP48 to inhibit carpel development.**

John SY. Eleblu<sup>1</sup>, Aimen Haraghi<sup>1</sup>, Brahim Mania<sup>1</sup>, Celine Camps<sup>1</sup>, Dali Rashid<sup>1</sup>, Halima Morin<sup>1</sup>, Catherine Dogimont<sup>2</sup>, Adnane Boualem<sup>1,3</sup> and Abdelhafid Bendahmane<sup>1,3,\*</sup>

<sup>1</sup>Institute of Plant Sciences Paris-Saclay IPS2, CNRS, INRA, University Paris-Sud, University of Evry, University Paris-Diderot, University of Paris-Saclay, Orsay cedex, France.

<sup>2</sup>UR 1052, Unité de Génétique et d'Amélioration des Fruits et Légumes, INRA, BP94, Montfavet, France.

<sup>3</sup>These authors jointly supervised this work: Abdelhafid Bendahmane and Adnane Boualem

\*Corresponding author. E-mail: [abdelhafid.bendahmane@inra.fr](mailto:abdelhafid.bendahmane@inra.fr)

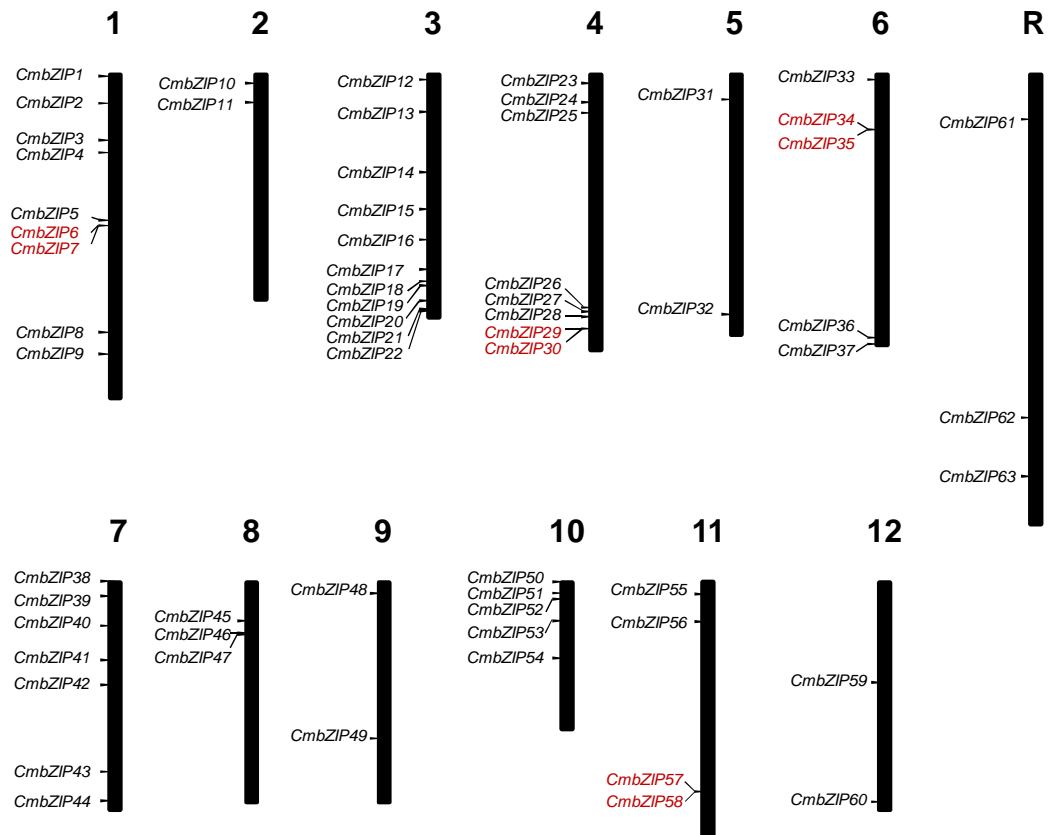

**Supplementary Figure 1: Distribution of *CmbZIP* genes on melon chromosomes.**

The scaled representation shows the physical locations of the *CmbZIPs* genes on the 12 melon chromosomes. Unanchored scaffolds are assembled in a random chromosome named R. Tandem-duplicated genes are indicated in dark red.



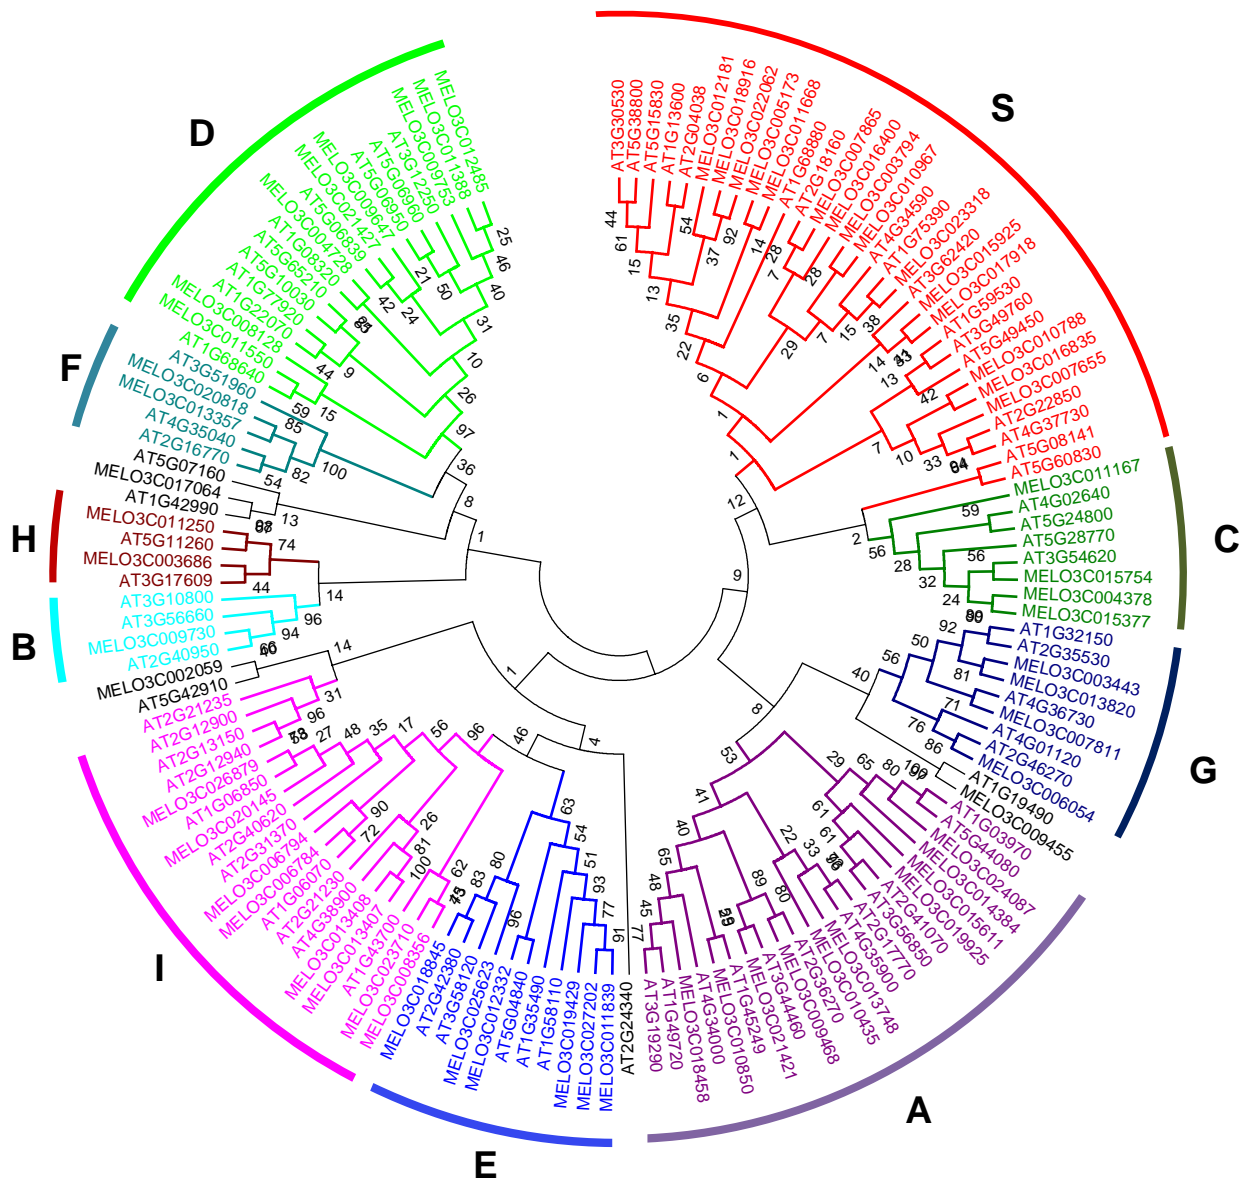

**Supplementary Figure 3: Phylogenetic tree of melon and Arabidopsis bZIP proteins.** The bZIP protein sequences were aligned by CLUSTALW and the phylogenetic tree was constructed using the Neighbor-Joining method by MEGA 7.0. Bootstrap values from 1000 replicates are indicated in each node. The CmbZIP proteins are grouped into 10 groups (A-I and S).

```

MELO3C011668_CmbZIP14  --ADERKQRRMISNRESARRSRMRKQKHVKEELCSQLLRCTQKHHEEKLRLVLMESQQRLL
MELO3C018916_CmbZIP42  LSLINERKQRRMISNRESARRSRMRKQKHLDELWSQVLLWRNENHQLIDKLNQVSECHDRA
MELO3C005173_CmbZIP49  RIVVDERKQRRMISNRESARRSRMRKQKHLDELWSVIVVRLRTENHSLMEKLNQLTDSEQQL
MELO3C022062_CmbZIP48  QSLINERKQRRMISNRESARRSRMRKQKHLDELWSQVLLWRNENHQLIDKLNQVSDCHDKV
MELO3C012181_CmbZIP52  KSIIDERKQRRMISNRESARRSRMRKQKHLDELWSQVLLWRNENHQLIDKLNHVSDNHEKV
AT3G30530_AtZIP42      NNIINERKQRRMISNRESARRSRMRKQKHLDELWSQVMWLRNENHQLIDKLNNLSESHDKV
AT1G13600_AtZIP58     -MVIDERKQRRMISNRESARRSRMRKQKHLDELWSQVIRLRITDNHCLMDKLNRVSESHELA
AT2G04038_AtZIP48     -MVLDERKQRRMISNRESARRSRMRKQKHLDELWSQVIRLRNENHQLIDKLNRVSETQNCV
AT5G38800_AtZIP43     KEIINERKQKRIISNRESARRSRMRKQKQVDELWSQVMWLRDENHQLLRKLNKCVLESQEKV
AT5G15830_AtZIP3      IFVINERKQRRMISNRESARRSRMRKQKHLDELWSQVAVLRSENHQLIDKLNQVSDNNDLV
AT5G08141_AtZIP75     ----EKKRLRRMASNRESARRSRMRERMMKEGLQMQVKQLMAYNQFLYNNKYISLLEYNHQI
AT5G60830_AtZIP70     GLAPEERRARRMVISNRESARRSRMRKKKQIEELQQQVEQLMMLNHLSEKVINLLESNHQI
AT1G68880_AtZIP8      ----NERKRRRKVISNRESARRSRMRKQKHEDELWSMLVQLINKNKSIVDELISQARECYEKV

```

**Supplementary Figure 4: Protein sequence alignment of the conserved bZIP domains of S2 sub-group proteins.**

Sequences were aligned using ClustalW. Conserved amino acids are highlighted in black. Invariant residues within the bZIP domain are colored in red.
